# Supplementary material
Source: ML conference proceedings conference paper supplement (https://openreview.net/forum?id=FxcoztYv98)
Supplement: supplementary_material [file attachment]

# Supplementary Materials: Foreground Harmonization and Shadow Generation for Composite Image

Anonymous Author(s)

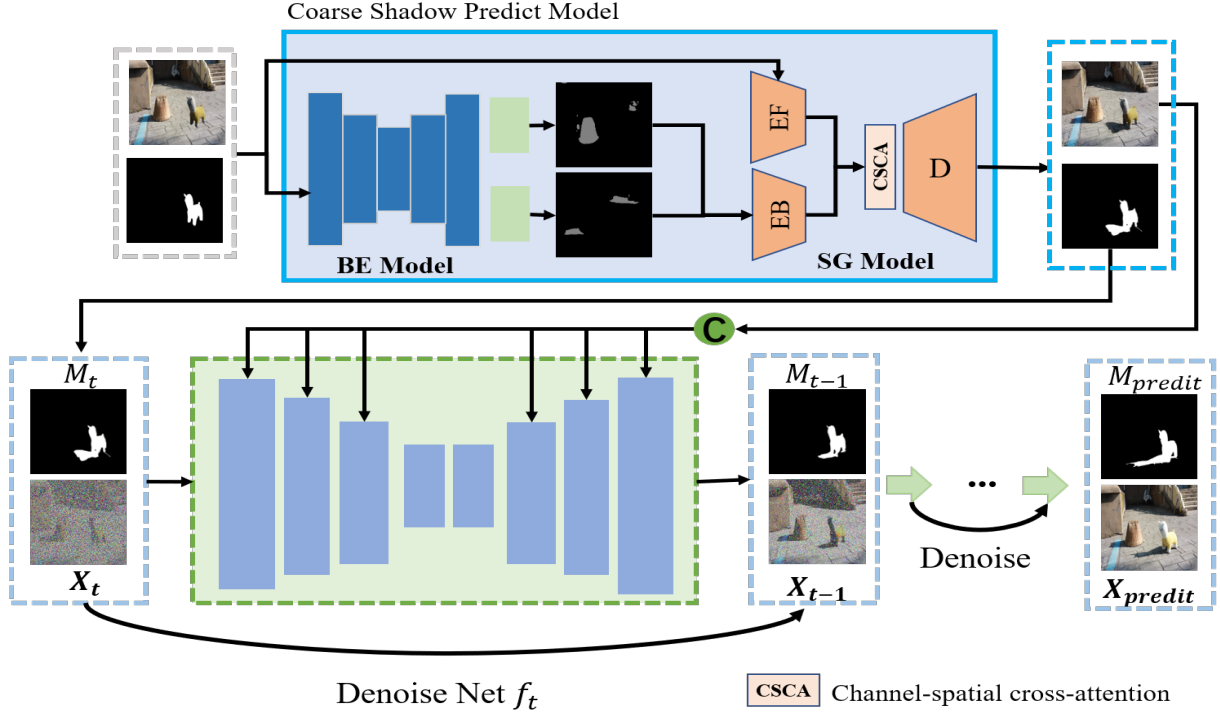

**Figure 1: Pipeline of the proposed method.** IH-SG Diffusion model includes coarse shadow prediction network (SP) and denoise network  $f_t$ . Given a disharmonious image, our model can generate a harmonious image with controllable foreground objects and reasonable cast shadows.

In this supplementary document, we first provide a detailed structure of our IH-SGDiffusion network to ensure better understanding and reproducibility. And in Figure 1, we have made some corrections to the rough shadow prediction module, as the original foreground extraction module  $EF$  was mistakenly marked as  $EB$ . In addition, we will provide more visual comparison results of different methods on IH-SG dataset. Our code, trained models, and dataset will be released upon the acceptance of our manuscript.

## 1 NETWORK STRUCTURE

The detailed structure of our IH-SG diffusion network is shown in Table 1. Symbols of the operators are listed as follows:

- $\text{Conv}(\text{cin}, \text{cout}, k, s, p)$ : a convolution operation with  $\text{cin}$  input channels,  $\text{cout}$  output channels, kernel size of  $k$ , stride size of  $s$ , and padding  $p$ .
- $\text{ConvT}(\text{cin}, \text{cout}, k, s, p)$ : a transposed convolution operation with  $\text{cin}$  input channels,  $\text{cout}$  output channels, kernel size of  $k$ , stride size of  $s$ , and padding  $p$ .
- BN: Batch Normalization.

- ReLU: Rectified Linear Unit, a widely used activation function in neural networks.
- Resblock: a Residual Block (Resblock), proposed by He et al. [3], extracts feature maps. Each Residual Block consists of consecutive operations including convolution (Conv), batch normalization (BN), and Leaky ReLU activation function.
- Concat: a concatenation operation in the channel dimension.

Overall, the Background Extraction module can be seen as a U-shaped network with two shared encoders, so it is not listed repeatedly. For the shadow generation module, it consists of two identical encoders and a decoder, as well as a channel space cross attention mechanism.

## 2 QUALITATIVE ANALYSIS

We have demonstrated more methods and the light and shadow editing results of IH-SG Diffusion. As shown in Figure 2. Compared with other methods, our results are more reasonable, harmonious, and visually closer to real images.

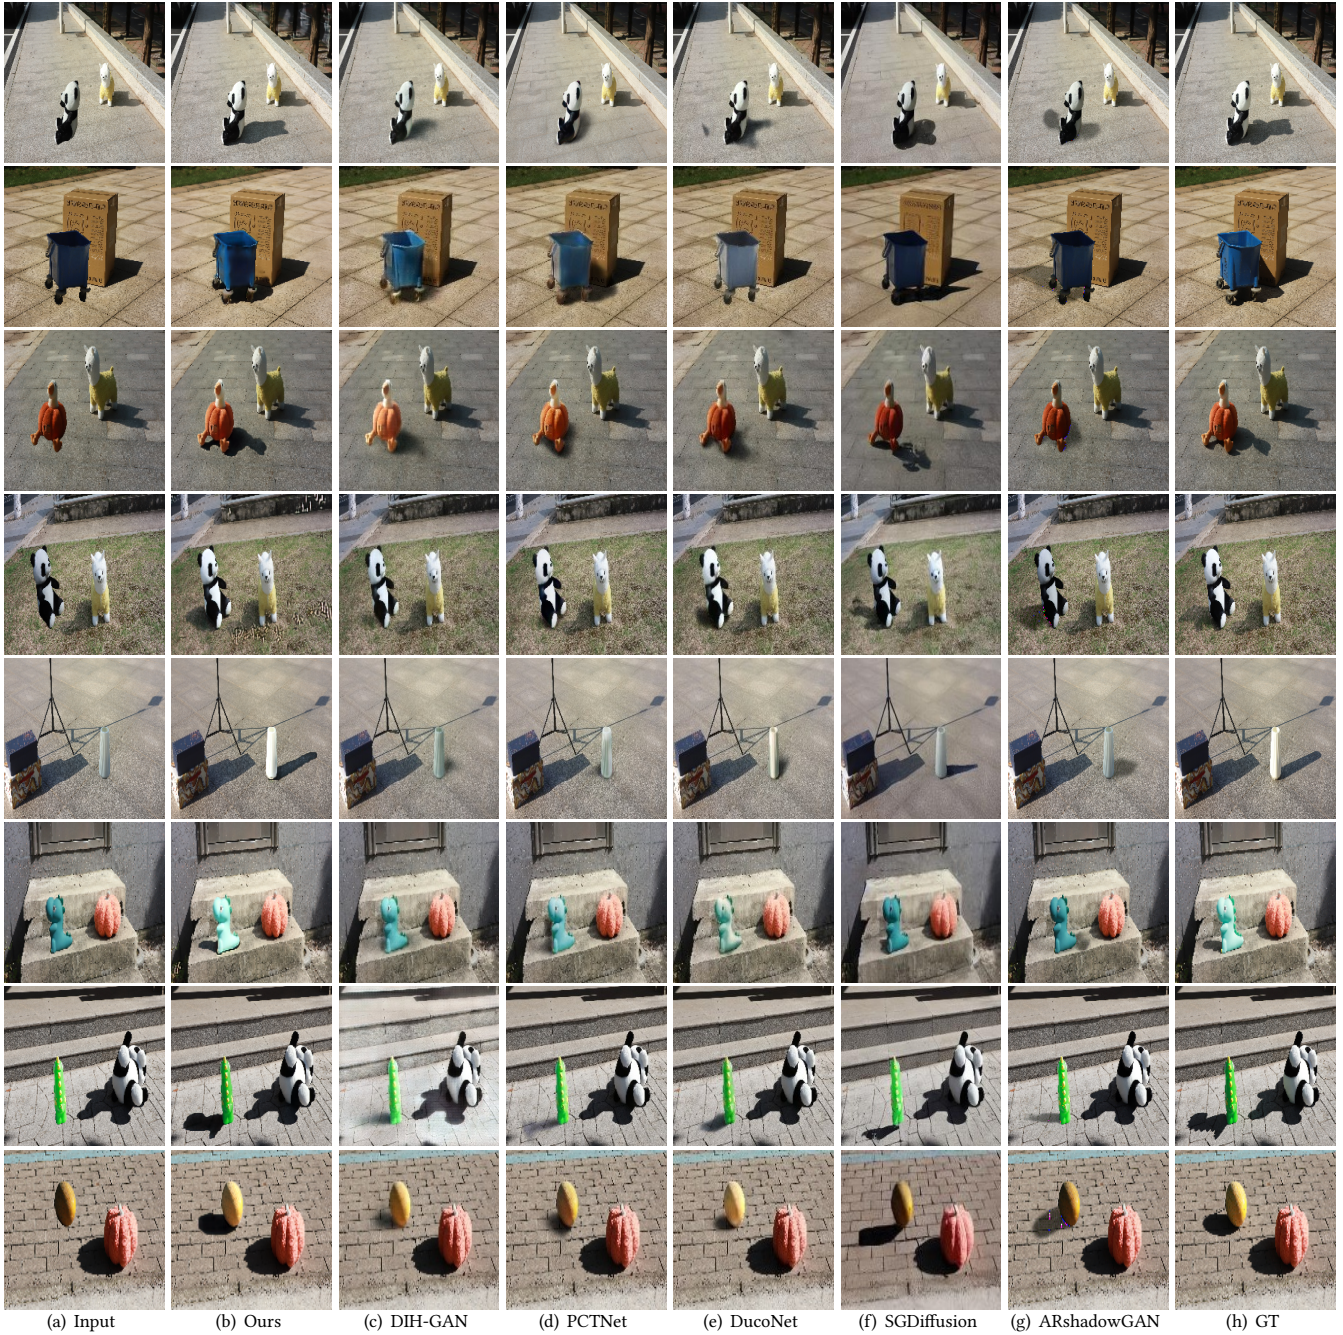

**Figure 2: Three testing cases of different methods on IH-SG dataset. From left to right are composite images, the results of our results, DIH-GAN [1], PCTNet [2], DucoNet [6] and the SGDiffusion [5], ARshadowGAN [4] and ground truth, respectively.**

## REFERENCES

- [1] Zhongyun Bao, Chengjiang Long, Gang Fu, Daquan Liu, Yanzhen Li, Jiaming Wu, and Chunxia Xiao. 2022. Deep Image-based Illumination Harmonization. In *Proceedings of the IEEE/CVF Conference on Computer Vision and Pattern Recognition*. 18542–18551.
- [2] Julian Jorge Andrade Guerreiro, Mitsuru Nakazawa, and Björn Stenger. 2023. PCT-Net: Full Resolution Image Harmonization Using Pixel-Wise Color Transformations. In *Proceedings of the IEEE/CVF Conference on Computer Vision and Pattern Recognition*. 5917–5926.
- [3] Kaiming He, Xiangyu Zhang, Shaoqing Ren, and Jian Sun. 2016. Deep residual learning for image recognition. In *Proceedings of the IEEE conference on computer vision and pattern recognition*. 770–778.
- [4] Daquan Liu, Chengjiang Long, Hongpan Zhang, Hanning Yu, Xinzhi Dong, and Chunxia Xiao. 2020. Arshadowgan: Shadow generative adversarial network for augmented reality in single light scenes. In *Proceedings of the IEEE/CVF conference on computer vision and pattern recognition*. 8139–8148.

**Table 2: The structure of shadow generation module.**

| Layer name(s) |                                          |
|---------------|------------------------------------------|
| 1             | Conv(3, 64, 3, 1, 1) + ReLU              |
| D1-1          | Conv(64, 64, 3, 1, 1) + ReLU             |
| D1-2          | Conv(64, 64, 3, 1, 1) + ReLU + maxpool   |
| D2-1          | Conv(64, 128, 3, 1, 1) + ReLU            |
| D2-2          | Conv(128, 128, 3, 1, 1) + ReLU + maxpool |
| D3-1          | Conv(128, 256, 3, 1, 1) + ReLU           |
| D3-2          | Conv(256, 256, 3, 1, 1) + ReLU + maxpool |
| D4-1          | Conv(256, 512, 3, 1, 1) + ReLU           |
| D4-2          | Conv(512, 512, 3, 1, 1) + ReLU + maxpool |
| M1            | Conv(512, 1024, 3, 1, 1)                 |
| M2            | Conv(1024, 1024, 3, 1, 1)                |
| U4-1          | ConvT(1024, 512, 3, 2, 1)                |
| C1            | Concat(U4-1, D4-2)                       |
| U3-1          | Conv(1024, 512, 3, 1, 1) + ReLU          |
| U3-2          | Conv(512, 512, 3, 1, 1) + ReLU           |
| U3-3          | ConvT(512, 256, 3, 2, 1)                 |
| C2            | Concat(U3-3, D3-2)                       |
| U2-1          | Conv(512, 256, 3, 2, 1) + ReLU           |
| U2-2          | Conv(256, 256, 3, 1, 1) + ReLU           |
| U2-3          | ConvT(256, 128, 3, 2, 1)                 |
| C3            | Concat(U2-3, D2-2)                       |
| U1-1          | Conv(256, 128, 3, 2, 1) + ReLU           |
| U1-2          | Conv(128, 128, 3, 1, 1) + ReLU           |
| U1-3          | ConvT(128, 64, 3, 2, 1)                  |
| C4            | Concat(U1-3, D1-2)                       |
| U0-1          | Conv(128, 64, 3, 1, 1) + ReLU            |
| U0-2          | Conv(64, 64, 3, 1, 1) + ReLU             |
| out           | Conv(64, 1, 3, 1, 1)                     |

**Table 1: The structure of background extraction module.**

| Layer name(s) |                                            |
|---------------|--------------------------------------------|
| 1             | Conv(4, 64, 7, 2, 3) + BN + ReLU + Avgpool |
| D1            | Resblock + Avgpool                         |
| D2            | Resblock + Avgpool                         |
| D3            | Resblock + Avgpool                         |
| D4            | Resblock + Avgpool                         |
| M1            | Conv(512, 1024, 3, 1, 1)                   |
| C1            | ConvT(1024, 512, 3, 2, 1)                  |
| U1            | Concat(D4, C1) + Conv + BN + ReLU          |
| C2            | ConvT(512, 256, 3, 2, 1)                   |
| U2            | Concat(D3, C2) + Conv + BN + ReLU          |
| C3            | ConvT(256, 128, 3, 2, 1)                   |
| U3            | Concat(D2, C3) + Conv + BN + ReLU          |
| C4            | ConvT(128, 64, 3, 2, 1)                    |
| U4            | Concat(D1, C4) + Conv + BN + ReLU          |
| out           | Conv(64, 2, 3, 1, 1)                       |

[5] Qingyang Liu, Junqi You, Jianting Wang, Xinhao Tao, Bo Zhang, and Li Niu. 2024. Shadow Generation for Composite Image Using Diffusion model. *arXiv preprint arXiv:2403.15234* (2024).

[6] Linfeng Tan, Jiangtong Li, Li Niu, and Liqing Zhang. 2023. Deep Image Harmonization in Dual Color Spaces. In *Proceedings of the 31st ACM International Conference on Multimedia*. 2159–2167.
